# Supplementary material
Source: PubMed Central journal article supplement (PMC3042569)
Supplement: mmc1.pdf [file mmc1.pdf]

Biophysical Journal, Volume 99

**Supporting Material**

**Title: Stable and metastable states of human amylin in solution**

Authors: Allam S Reddy, Lu Wang, Sadanand Singh, Yun L. Ling, Lauren Buchanan, Martin T. Zanni, James L. Skinner, and Juan J. De Pablo

**REFeree 1:**

**I found the observation that the human IAPP ensemble can be separated into macrostates, one involving a helical conformation plus short beta strand, a second with a full beta-hairpin conformation, and a third defined as random coil, quite interesting . The thermodynamic integration indicates that the "aggregation competent" beta-hairpin is a more stable conformation. Related to this point, the authors refer to the lowest free energy state as the "misfolded" state (explaining this as an extension of terminology used for CGRP). However, as the beta-hairpin is identified as the lowest free energy conformation, I find the terminology**

# Supplemental Material: Stable and metastable states of human amylin in solution

Allam S Reddy

Department of Chemical and Biological Engineering,  
University of Wisconsin-Madison, Madison, WI 53706.

Lu Wang

Department of Chemistry,  
University of Wisconsin-Madison, Madison, WI 53706.

Sadanand Singh

Department of Chemical and Biological Engineering,  
University of Wisconsin-Madison, Madison, WI 53706.

Yun L Ling

Department of Chemistry,  
University of Wisconsin-Madison, Madison, WI 53706.

Lauren Buchanan

Department of Chemistry,  
University of Wisconsin-Madison, Madison, WI 53706.

Martin T Zanni

Department of Chemistry,  
University of Wisconsin-Madison, Madison, WI 53706.

James L Skinner

Department of Chemistry,  
University of Wisconsin-Madison, Madison, WI 53706.

Juan J. de Pablo\*

Department of Chemical and Biological Engineering,  
University of Wisconsin-Madison, Madison, WI 53706.

---

\*Corresponding author. E-mail: depablo@engr.wisc.edu.

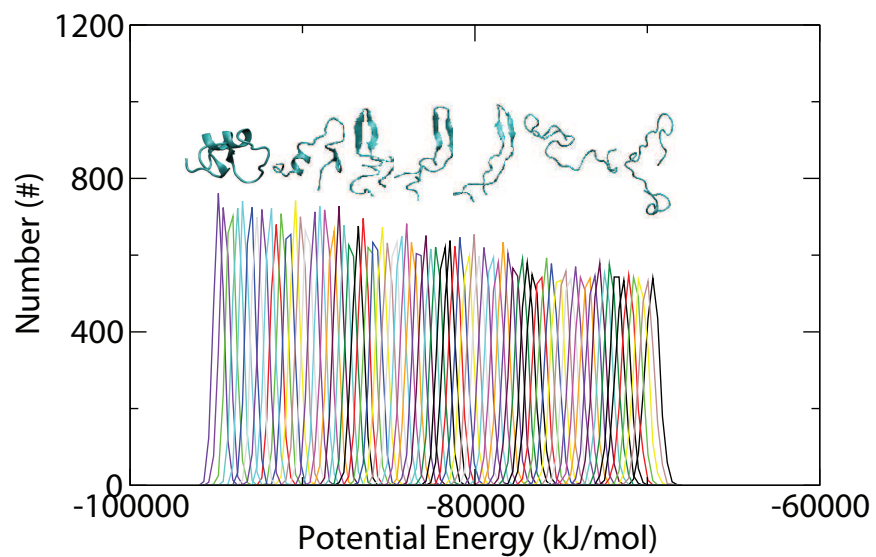

Figure S1: Probability distribution curves of potential energy, at the 74 different temperatures (between 273–578 K) used in REMD simulations.

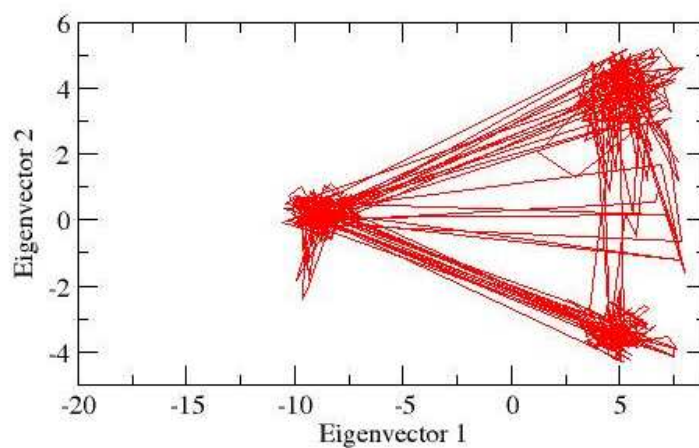

Figure S2: Principal component analysis revealing the presence of 3 major clusters corresponding to the three conformations discussed in this manuscript.

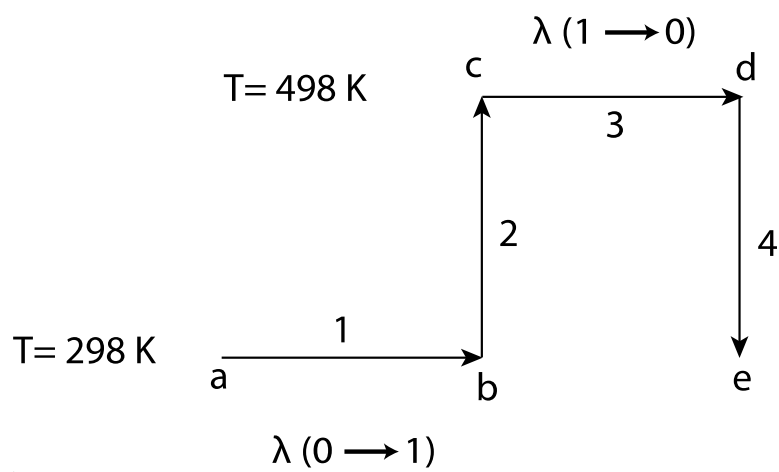

Figure S3: Schematic representation of the path used in Thermodynamic Integration as explained in the text.
